# Supplementary material for: Durable Remission of Renal Cell Carcinoma in Conjuncture with Graft versus Host Disease following Allogeneic Stem Cell Transplantation and Donor Lymphocyte Infusion: Rule or Exception?
Source: PLOS journal article supplement (doi:10.1371/journal.pone.0085198), 2014-01-15
Supplement: S1 (10.1371/journal.pone.0085198.s001) [file journal.pone.0085198.s001]

Figure S2: Frequency of circulating MiHA specific T cells after in-vitro peptide stimulation

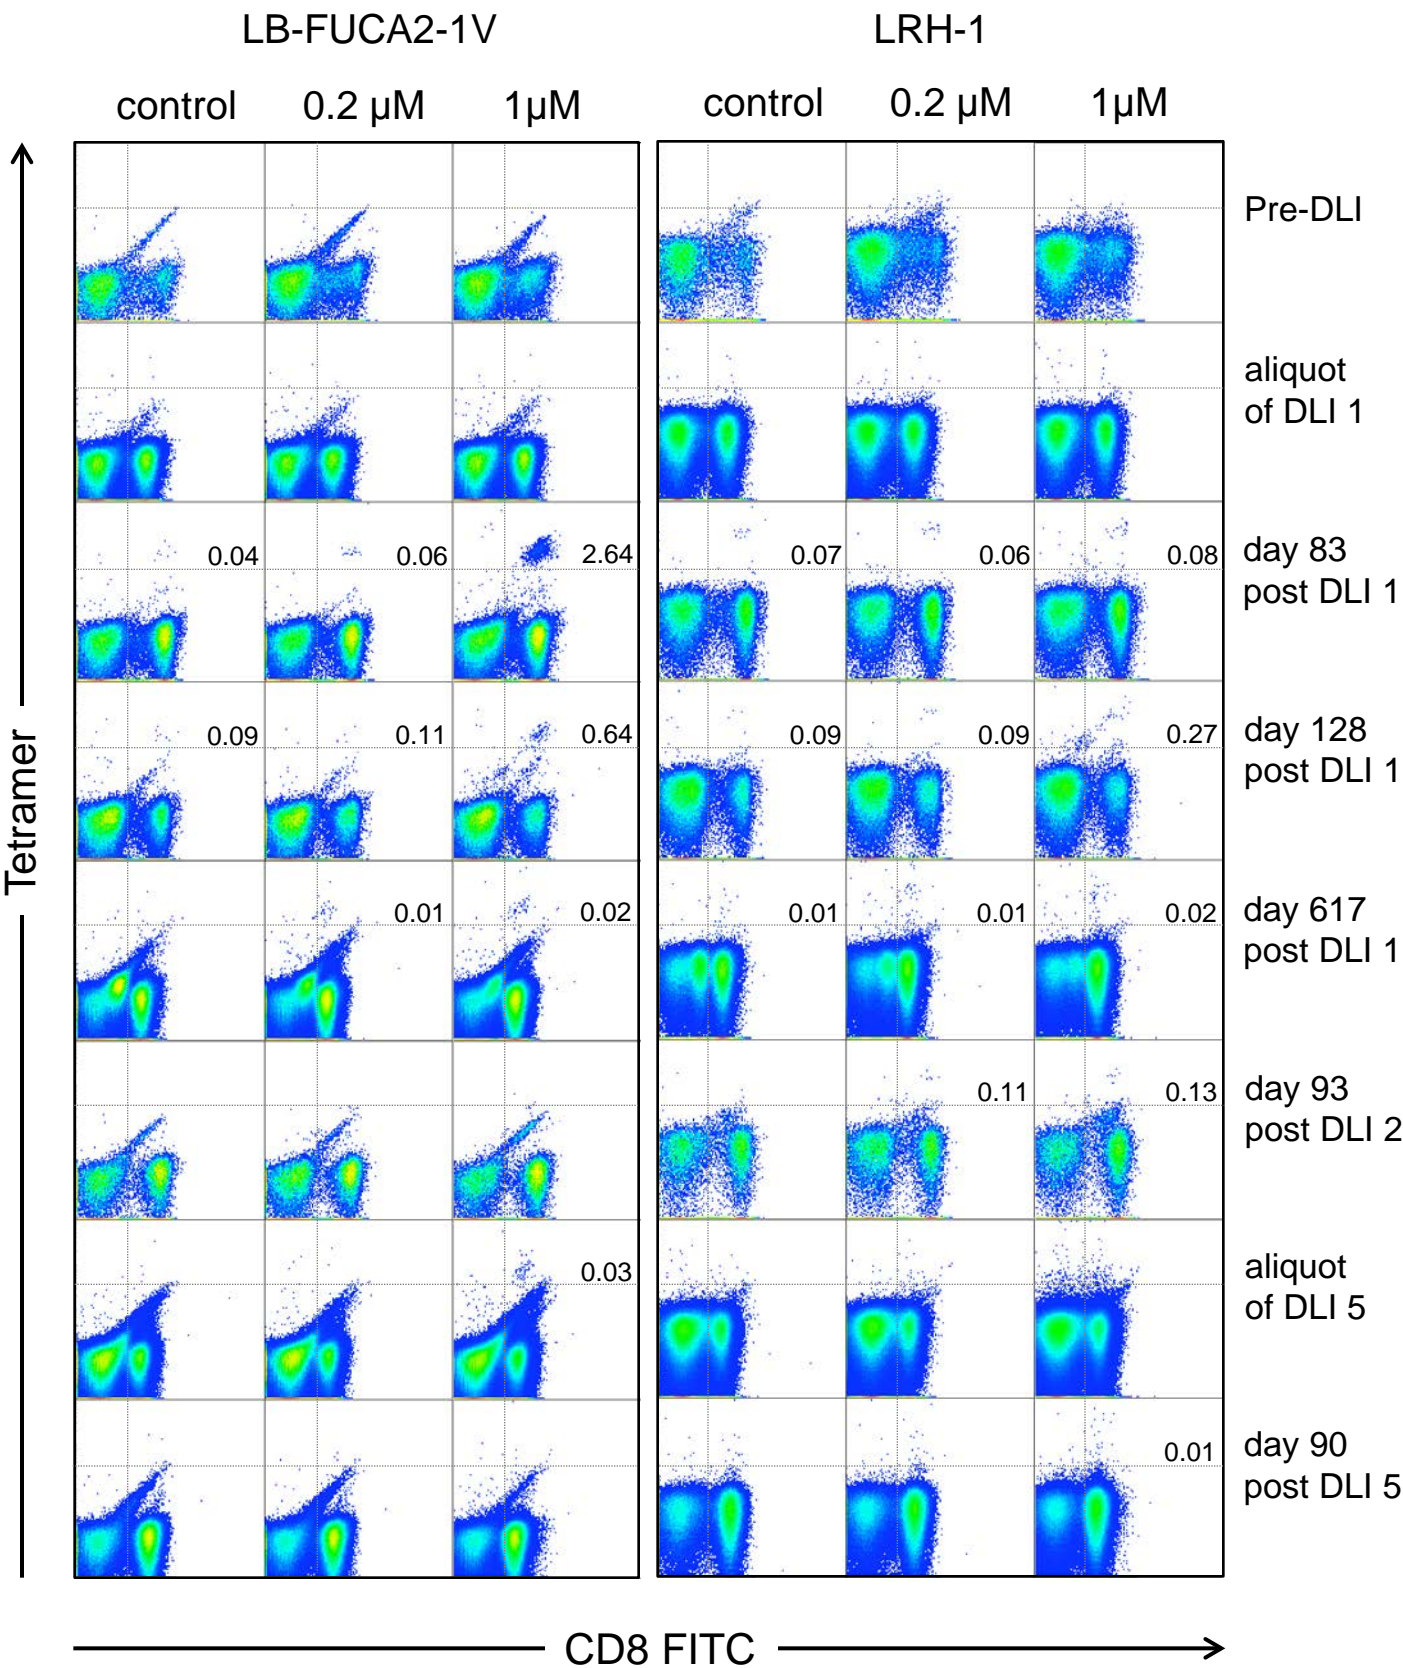

## Legend to Figure S2: Frequency of circulating MiHA specific T cells after in-vitro peptide stimulation

Donor derived monocytes were isolated using CD14 microbeads and pulsed overnight with 0.2  $\mu$ M or 1  $\mu$ M of LB-FUCA2-1V or LRH-1 peptide or medium alone. Aliquots of donor lymphocytes used for DLI and samples of patient PBMC taken before and after DLI were co-cultured with peptide pulsed monocytes in the presence of 30 IU/ml IL-2. After 7 days, MiHA specific T cells were analyzed using CD8<sup>FITC</sup> and LB-FUCA2-1V<sup>PE</sup> (left panels) and LRH-1<sup>APC</sup> (right panels) tetramers, respectively. In samples containing discrete populations of tetramer<sup>pos</sup> cells, the percentage of tetramer<sup>pos</sup> events calculated as a percentage of CD8<sup>+</sup> T cells is depicted.
